# Supplementary material
Source: PubMed Central journal article supplement (PMC8421090)

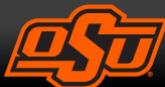

Researchers at Oklahoma State University and Purdue University are conducting a survey in an effort to examine current opinions in light of the COVID-19 pandemic.

These research procedures have been approved by Oklahoma State's Institutional Review Board. Your participation is strictly voluntary and your response to this survey will be kept completely anonymous. The survey will take approximately 15 minutes. You must be 18 or older to participate. If you have any questions regarding your survey participation, please contact Courtney Bir at [courtney.bir@okstate.edu](mailto:courtney.bir@okstate.edu) or Scott Hall at OSU IRB [irb@okstate.edu](mailto:irb@okstate.edu) - 405-744-3377 - 219

I am:

Female

Male

I am \_\_\_\_ years old.

- Under 18  
 18 - 24  
 25 - 34  
 35 - 44  
 45 - 54  
 55 - 64  
 65 +

My household (including all other adults and children living in my household) has the following number of members (include yourself), please place a zero if you do not have children in your household:

Adults (18 years and older)

Children (Under 18 years old)

My annual pre-tax, household income is:

- \$0-\$24,999  
 \$25,000-\$49,999  
 \$50,000-\$74,999  
 \$75,000-\$99,999  
 \$100,000 and higher

The best description of my educational background is:

- Did not graduate from high school  
 Graduated from high school, Did not attend college  
 Attended College, No Degree earned  
 Attended College, Associate's or Bachelor's Degree earned  
 Attended College, Graduate or Professional Degree earned

Please select the primary occupations of the adults within your household (select all that apply).

- |                                                      |                                                                                 |                                                                       |
|------------------------------------------------------|---------------------------------------------------------------------------------|-----------------------------------------------------------------------|
| <input type="checkbox"/> Police officer/fire fighter | <input type="checkbox"/> Veterinarian/vet tech                                  | <input type="checkbox"/> Government                                   |
| <input type="checkbox"/> Education                   | <input type="checkbox"/> Dental (Dentist, dental hygienist, dental office etc.) | <input type="checkbox"/> Nurse                                        |
| <input type="checkbox"/> Oil and Natural Gas         | <input type="checkbox"/> Hairdresser/beautician/nail technician                 | <input type="checkbox"/> Bus driver/taxi driver/other driving service |

Qualtrics Survey Software

- Food Service (including restaurants, cafeterias, and prepared foods)
- Medical doctor
- Sales/Service/Retail Stores (including grocery stores, supermarkets, and other retailers)
- EMT
- Pharmacy (pharmacist, pharmacy technician, etc.)
- Farmer/Rancher
- Technology and IT
- Delivery driver/mailperson (including home delivery services of all kinds)
- Other

My region of residence is: \_\_\_\_\_. Select one option from the drop down menu.

My state of residence in the Northeast is:

My state of residence in the South is:

My state of residence in the Midwest is:

My state of residence in the West is:

Please indicate on the following scale how impacted you were by COVID-19 in the following situations

|                                                                  | 1 (Not impacted)      | 2                     | 3                     | 4                     | 5 (Impacted)          | Does not apply to me  |
|------------------------------------------------------------------|-----------------------|-----------------------|-----------------------|-----------------------|-----------------------|-----------------------|
| Your daily activities outside of work/school                     | <input type="radio"/> |
| Ability to buy paper products (e.g., toilet paper, paper towels) | <input type="radio"/> |
| Activities related to your work/school                           | <input type="radio"/> |
| Ability to execute travel plans                                  | <input type="radio"/> |
| Ability to find meat, milk, and perishable grocery items         | <input type="radio"/> |

Please indicate which of the following occurred as a result of COVID-19

- My childcare and educational routine did not change due to COVID-19
- I was not able to continue working or had to cut back on work hours due to childcare responsibilities
- My child was no longer able to attend daycare, stay with a family member etc for childcare
- I had to take on schooling activities for my child

Do you agree that masks (meaning any face covering that covers your nose and mouth) have any role in U.S. society related to the spread of viral disease, especially COVID-19, in the June - December 2020 time frame?"

- NO - they have absolutely no role whatsoever in U.S. society
- YES - they have some potential role in U.S. society

Please select all of the following that you believe are true (select all that apply)

- Wearing a mask will help prevent future lock-downs in my community related to COVID-19
- Wearing a mask helps prevent me from getting COVID-19
- Wearing a mask helps prevent me from spreading COVID-19
- Wearing a mask helps prevent the spread of COVID-19
- There is social pressure in my community to wear a mask
- Wearing a mask does not prevent the spread of COVID-19
- Wearing a mask has negative health consequences for the mask wearer
- I wore a mask routinely at work prior to COVID-19
- I routinely wore a head or face covering for religious or personal reasons prior to COVID-19

Please indicate your mask-usage in response to COVID-19 in the following place (select all that apply).

|                                                                | I wear a mask voluntarily | I am required to wear a mask | I do not wear a mask     | I do not go to this place | This type of business is not open in my community |
|----------------------------------------------------------------|---------------------------|------------------------------|--------------------------|---------------------------|---------------------------------------------------|
| In person religious service                                    | <input type="checkbox"/>  | <input type="checkbox"/>     | <input type="checkbox"/> | <input type="checkbox"/>  | <input type="checkbox"/>                          |
| Home improvement store                                         | <input type="checkbox"/>  | <input type="checkbox"/>     | <input type="checkbox"/> | <input type="checkbox"/>  | <input type="checkbox"/>                          |
| Big box grocery store/supermarket                              | <input type="checkbox"/>  | <input type="checkbox"/>     | <input type="checkbox"/> | <input type="checkbox"/>  | <input type="checkbox"/>                          |
| Workplace                                                      | <input type="checkbox"/>  | <input type="checkbox"/>     | <input type="checkbox"/> | <input type="checkbox"/>  | <input type="checkbox"/>                          |
| School                                                         | <input type="checkbox"/>  | <input type="checkbox"/>     | <input type="checkbox"/> | <input type="checkbox"/>  | <input type="checkbox"/>                          |
| Retail store other than grocery, clothing, or home improvement | <input type="checkbox"/>  | <input type="checkbox"/>     | <input type="checkbox"/> | <input type="checkbox"/>  | <input type="checkbox"/>                          |
| Specialty grocery store                                        | <input type="checkbox"/>  | <input type="checkbox"/>     | <input type="checkbox"/> | <input type="checkbox"/>  | <input type="checkbox"/>                          |
| Restaurant                                                     | <input type="checkbox"/>  | <input type="checkbox"/>     | <input type="checkbox"/> | <input type="checkbox"/>  | <input type="checkbox"/>                          |
| Gym                                                            | <input type="checkbox"/>  | <input type="checkbox"/>     | <input type="checkbox"/> | <input type="checkbox"/>  | <input type="checkbox"/>                          |
| Clothing store                                                 | <input type="checkbox"/>  | <input type="checkbox"/>     | <input type="checkbox"/> | <input type="checkbox"/>  | <input type="checkbox"/>                          |

Thinking about societal impacts and welfare broadly speaking in June - December 2020 which locations do you feel mask usage is most important?

You will choose the locations with the most important and least important roles in terms of mask usage contributing to human well-being in light of what is currently known about COVID-19. A subset of the locations below will be presented 7 times.

- Grocery/food stores
- Home improvement/hardware store
- Retail settings other than grocery store/home improvement store (i.e. department and other retailers)
- Religious services (i.e. attending church or religious services or gatherings)
- Schools
- Restaurants
- Public transportation (in buses, airplanes, trains or other transportation interacting with any member of the public)

From the following set of locations, where do you believe that masks have the **most important** and **least important** role in contributing to human well-being

Most important

Least important

- |                       |                                                                                |                       |
|-----------------------|--------------------------------------------------------------------------------|-----------------------|
| <input type="radio"/> | Religious services (i.e. attending church or religious services or gatherings) | <input type="radio"/> |
| <input type="radio"/> | Home improvement/hardware store                                                | <input type="radio"/> |
| <input type="radio"/> | Restaurants                                                                    | <input type="radio"/> |

From the following set of locations, where do you believe that masks have the **most important** and **least important** role in contributing to human well-being

Most important

Least important

- |                       |                                                                                                                       |                       |
|-----------------------|-----------------------------------------------------------------------------------------------------------------------|-----------------------|
| <input type="radio"/> | Schools                                                                                                               | <input type="radio"/> |
| <input type="radio"/> | Restaurants                                                                                                           | <input type="radio"/> |
| <input type="radio"/> | Public transportation (in buses, airplanes, trains or other transportation interacting with any member of the public) | <input type="radio"/> |

From the following set of locations, where do you believe that masks have the **most important** and **least important** role in contributing to human well-being

Most important

Least important

- |                       |                                                                                                       |                       |
|-----------------------|-------------------------------------------------------------------------------------------------------|-----------------------|
| <input type="radio"/> | Religious services (i.e. attending church or religious services or gatherings)                        | <input type="radio"/> |
| <input type="radio"/> | Retail settings other than grocery store/home improvement store (i.e. department and other retailers) | <input type="radio"/> |
| <input type="radio"/> | Schools                                                                                               | <input type="radio"/> |

From the following set of locations, where do you believe that masks have the **most important** and **least important** role in contributing to human well-being

Most important

Least important

- |                       |                                                                                                                       |                       |
|-----------------------|-----------------------------------------------------------------------------------------------------------------------|-----------------------|
| <input type="radio"/> | Public transportation (in buses, airplanes, trains or other transportation interacting with any member of the public) | <input type="radio"/> |
| <input type="radio"/> | Retail settings other than grocery store/home improvement store (i.e. department and other retailers)                 | <input type="radio"/> |
| <input type="radio"/> | Home improvement/hardware store                                                                                       | <input type="radio"/> |

From the following set of locations, where do you believe that masks have the **most important** and **least important** role in contributing to human well-being

Most important

Least important

- |                       |                                                                                                                       |                       |
|-----------------------|-----------------------------------------------------------------------------------------------------------------------|-----------------------|
| <input type="radio"/> | Religious services (i.e. attending church or religious services or gatherings)                                        | <input type="radio"/> |
| <input type="radio"/> | Grocery/food stores                                                                                                   | <input type="radio"/> |
| <input type="radio"/> | Public transportation (in buses, airplanes, trains or other transportation interacting with any member of the public) | <input type="radio"/> |

From the following set of locations, where do you believe that masks have the **most important** and **least important** role in contributing to human well-being

Most important

Least important

- |                       |                                 |                       |
|-----------------------|---------------------------------|-----------------------|
| <input type="radio"/> | Home improvement/hardware store | <input type="radio"/> |
| <input type="radio"/> | Schools                         | <input type="radio"/> |
| <input type="radio"/> | Grocery/food stores             | <input type="radio"/> |

From the following set of locations, where do you believe that masks have the **most important** and **least important** role in contributing to human well-being

Most important

Least important

|                       |                                                                                                       |                       |
|-----------------------|-------------------------------------------------------------------------------------------------------|-----------------------|
| <input type="radio"/> | Grocery/food stores                                                                                   | <input type="radio"/> |
| <input type="radio"/> | Retail settings other than grocery store/home improvement store (i.e. department and other retailers) | <input type="radio"/> |
| <input type="radio"/> | Restaurants                                                                                           | <input type="radio"/> |

Please indicate on a scale from 1 (strongly disagree) to 5 (strongly agree) your level of agreement with the following statements.

|                                                                                                               | 1 (strongly disagree) | 2                     | 3                     | 4                     | 5 (strongly agree)    |
|---------------------------------------------------------------------------------------------------------------|-----------------------|-----------------------|-----------------------|-----------------------|-----------------------|
| I believe we have a societal responsibility to protect the elderly                                            | <input type="radio"/> |
| I frequently smoke                                                                                            | <input type="radio"/> |
| Gun ownership is a right based on the U.S. Constitution                                                       | <input type="radio"/> |
| Someone in my household, or that I frequently spend time, with is at higher risk of complications of COVID-19 | <input type="radio"/> |
| Healthcare is a human right                                                                                   | <input type="radio"/> |
| I am in the higher risk group for complications of COVID-19                                                   | <input type="radio"/> |
| I frequently drink alcohol                                                                                    | <input type="radio"/> |
| I believe we have a societal responsibility to protect children                                               | <input type="radio"/> |
| I always wear my seat belt when driving                                                                       | <input type="radio"/> |

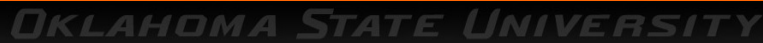

Supplement: mmc1.pdf [file mmc1.pdf]
